# Supplementary material for: Alkaline-SDS cell lysis of microbes with acetone protein precipitation for proteomic sample preparation in 96-well plate format
Source: PubMed Central journal article supplement (PMC10328223; doi:10.1371/journal.pone.0288102), 2023-07-07
Supplement: pone.0288102.s002.pdf [file pone.0288102.s002.pdf]

**Manuscript Number PONE-D-23-03070**

**Alkaline-SDS cell lysis of microbes with acetone protein precipitation for proteomic sample preparation in 96-well plate format**

Recommendation: Publish after resubmission.

Comments:

Abstract: Authors should be refurnished abstract.

1. Authors should be checked grammar “in alkaline chemical buffer” or “in an alkaline chemical buffer”?

Introduction: Authors should be rechecked

Result sections:

1. You have extracted protein from Gram-positive bacteria species, Gram-negative bacteria species, and non-filamentous fungi species with  $\sim 2 \times 10^9$  cells of biomass from each species but why did Gram-positive bacteria species total protein obtained very less than Gram-negative species and non-filamentous?. Does protein extraction concentration depend on species? Any specification on the extraction?
2. Haven't tested any animal cell line/tissues. You should test on primary cells or cell lines because that is good for justification for microbial protocol. The author should at least do the test on either animal tissues/primary cells/cell lines. It may be not applicable to animal cells.

Figure Captions:

1. Fig.1: Error bars should be represented by a minimum of three replicates performed on a separate day. Any justification for why the authors' error bars represented two replicates performed/experiments?
